# Supplementary material for: Sonographic Markers Are Useful for Detection of Early Vascular Deterioration in Children with Overweight/Obesity: Effect of a 1-Year Combined Nutritional Education and Physical Exercise Program
Source: MDPI journal article supplement (doi:10.3390/nu15040894), 2023-02-10
Supplement: s1 [file s1]

**Supplementary Table S1. Baseline characteristics of the study participants attending to allocation group and sex**

|                           | CONTROL (n=29) |              | <i>p</i> (t) | INTERVENTION (n=148) |              | <i>p</i> (t) |
|---------------------------|----------------|--------------|--------------|----------------------|--------------|--------------|
|                           | Boys (n=10)    | Girls (n=19) |              | Boys (n=77)          | Girls (n=71) |              |
| Age (y)                   | 8 ± 2          | 8 ± 2        | 0.408        | 8 ± 2                | 8 ± 2        | 0.820        |
| Weight (kg)               | 33.3 ± 6.5     | 32.2 ± 6.1   | 0.657        | 41.5 ± 9.6           | 41.4 ± 9.5   | 0.930        |
| Height (cm)               | 132.5 ± 9.6    | 129.7 ± 9.3  | 0.450        | 133.4 ± 10.2         | 133.9 ± 11.1 | 0.805        |
| BMI (z-score)             | 1.38 ± 0.18    | 1.35 ± 0.18  | 0.719        | 2.96 ± 1.05          | 2.61 ± 0.69  | 0.058        |
| Body fat mass (kg)        | 7.20 ± 1.60    | 8.71 ± 2.49  | 0.096        | 13.14 ± 5.04         | 14.15 ± 4.55 | 0.304        |
| Waist circumference (cm)  | 67.3 ± 5.0     | 67.5 ± 5.6   | 0.935        | 78.4 ± 9.4           | 77.4 ± 8.1   | 0.602        |
| SBP (mmHg)                | 105.8 ± 8.9    | 107.0 ± 7.8  | 0.722        | 107.0 ± 10.7         | 108.5 ± 10.9 | 0.482        |
| DBP (mmHg)                | 65.5 ± 8.0     | 71.7 ± 8.3   | 0.063        | 68.1 ± 8.3           | 69.3 ± 9.1   | 0.494        |
| AST (IU/l)                | 30.1 ± 4.6     | 30.5 ± 6.6   | 0.875        | 34.0 ± 9.7           | 34.4 ± 9.5   | 0.876        |
| ALT (IU/l)                | 26.7 ± 3.2     | 26.0 ± 8.0   | 0.793        | 31.7 ± 14.7          | 34.5 ± 12.9  | 0.310        |
| AST/ALT ratio             | 1.13 ± 0.12    | 1.21 ± 0.26  | 0.340        | 1.16 ± 0.46          | 1.06 ± 0.35  | 0.229        |
| GGT (IU/l)                | 13.2 ± 4.2     | 15.0 ± 6.5   | 0.450        | 16.1 ± 5.6           | 16.7 ± 5.1   | 0.714        |
| Total cholesterol (mg/dl) | 143.4 ± 21.4   | 155.6 ± 22.2 | 0.164        | 161.5 ± 24.5         | 151.4 ± 33.2 | 0.091        |
| Triglycerides (mg/dl)     | 90.3 ± 30.9    | 89.5 ± 49.4  | 0.916        | 100.7 ± 47.9         | 117.6 ± 76.7 | 0.190        |
| HDL-cho (mg/dl)           | 51.4 ± 6.3     | 56.3 ± 14.2  | 0.810        | 51.5 ± 13.5          | 46.9 ± 9.6   | 0.050        |
| LDL-cho (mg/dl)           | 73.7 ± 19.6    | 82.1 ± 16.8  | 0.240        | 90.3 ± 19.7          | 83.4 ± 28.5  | 0.160        |
| FPG (mg/dl)               | 85.1 ± 3.5     | 83.6 ± 8.4   | 0.604        | 86.8 ± 4.8           | 85.3 ± 5.9   | 0.169        |
| Insulin (IU/ml)           | 5.0 ± 1.6      | 6.3 ± 3.0    | 0.217        | 8.0 ± 4.1            | 12.2 ± 12.4  | <b>0.032</b> |
| HOMA index                | 1.03 ± 0.30    | 1.32 ± 0.67  | 0.201        | 1.72 ± 0.95          | 2.64 ± 3.00  | 0.053        |
| Carotid IMT (mm)          | 0.47 ± 0.05    | 0.45 ± 0.05  | 0.540        | 0.50 ± 0.08          | 0.46 ± 0.08  | <b>0.013</b> |
| Hepatic Shear Rate (KPa)  | 1.31 ± 0.14    | 1.38 ± 0.17  | 0.289        | 1.27 ± 0.17          | 1.38 ± 0.23  | <b>0.012</b> |

Data represent mean ± sd. Differences were analysed by Student's t test.

**Supplementary Table S2. Anthropometrical and clinical characteristics of the participants at baseline and at the end of the intervention**

|                           | CONTROL (n=29) |                     |        |                  | INTERVENTION (n=148) |                     |        |                  |                                 |
|---------------------------|----------------|---------------------|--------|------------------|----------------------|---------------------|--------|------------------|---------------------------------|
|                           | Baseline       | End of intervention | p      | Treatment effect | Baseline             | End of intervention | p      | Treatment Effect | Effect Size (partial $\eta^2$ ) |
| Weight (kg)               | 32.6 ± 6.1     | 35.1 ± 6.6          | <0.001 | 2.5              | 41.5 ± 9.5           | 43.8 ± 10.3         | <0.001 | 2.3              | 0.636                           |
| BMI (z-score)             | 1.36 ± 0.18    | 1.27 ± 0.31         | 0.033  | -0.09            | 2.80 ± 0.91          | 2.44 ± 0.80         | <0.001 | -0.36            | 0.004                           |
| Body fat mass (kg)        | 8.19 ± 2.31    | 8.13 ± 2.33         | 0.846  | -0.06            | 13.61 ± 4.82         | 13.47 ± 4.76        | 0.214  | -0.14            | 0.005                           |
| Waist circumference (cm)  | 67.4 ± 5.3     | 70.0 ± 5.4          | <0.001 | 2.6              | 77.9 ± 8.7           | 80.3 ± 9.2          | <0.001 | 2.4              | 0.340                           |
| SBP (mmHg)                | 106.6 ± 8.1    | 104.1 ± 11.0        | 0.354  | -2.5             | 107.7 ± 10.8         | 109.5 ± 10.4        | 0.408  | 1.8              | 0.001                           |
| DBP (mmHg)                | 69.6 ± 8.6     | 63.8 ± 8.4          | 0.003  | -5.8             | 68.7 ± 8.7           | 68.2 ± 6.5          | 0.002  | -0.5             | 0.083                           |
| AST (IU/l)                | 30.3 ± 5.9     | 32.2 ± 5.6          | 0.180  | 1.9              | 34.1 ± 9.6           | 33.0 ± 8.7          | 0.374  | -1.1             | 0.001                           |
| ALT (IU/l)                | 26.2 ± 6.7     | 24.0 ± 6.0          | 0.037  | -2.2             | 33.0 ± 13.9          | 30.5 ± 13.4         | 0.267  | -2.5             | 0.014                           |
| AST/ALT ratio             | 1.18 ± 0.22    | 1.38 ± 0.28         | 0.002  | 0.20             | 1.12 ± 0.41          | 1.18 ± 0.40         | 0.399  | 0.06             | 0.047                           |
| GGT (IU/l)                | 14.3 ± 5.8     | 15.6 ± 3.2          | 0.165  | 1.3              | 16.9 ± 5.4           | 18.4 ± 4.9          | 0.012  | 1.5              | 0.046                           |
| Total cholesterol (mg/dl) | 151.4 ± 22.3   | 156.7 ± 29.3        | 0.152  | 5.3              | 156.8 ± 29.1         | 158.8 ± 26.9        | 0.664  | 2.0              | 0.012                           |
| Triglycerides (mg/dl)     | 90.1 ± 43.3    | 79.9 ± 32.9         | 0.163  | -10.2            | 108.5 ± 63.1         | 91.1 ± 42.6         | 0.012  | -17.4            | 0.040                           |
| HDL-chol (mg/dl)          | 54.6 ± 12.2    | 58.5 ± 11.9         | 0.047  | 3.9              | 49.3 ± 12.0          | 51.5 ± 12.2         | 0.129  | 2.2              | 0.044                           |
| LDL-chol (mg/dl)          | 79.2 ± 17.9    | 82.3 ± 23.5         | 0.376  | 3.1              | 87.1 ± 24.3          | 89.4 ± 22.3         | 0.458  | 2.3              | 0.010                           |
| FPG (mg/dl)               | 84.1 ± 7.1     | 85.6 ± 6.1          | 0.322  | 1.5              | 86.1 ± 5.3           | 86.2 ± 6.1          | 0.843  | 0.1              | 0.006                           |
| Insulin (IU/ml)           | 5.8 ± 2.7      | 7.6 ± 2.4           | 0.002  | 1.8              | 9.9 ± 9.1            | 11.4 ± 7.1          | 0.247  | 1.5              | 0.022                           |
| HOMA index                | 1.22 ± 0.58    | 1.62 ± 0.56         | 0.002  | 0.40             | 2.15 ± 2.19          | 2.45 ± 1.62         | 0.295  | 0.30             | 0.019                           |
| Carotid IMT (mm)          | 0.46 ± 0.05    | 0.36 ± 0.06         | <0.001 | -0.10            | 0.48 ± 0.08          | 0.37 ± 0.06         | <0.001 | -0.11            | 0.503                           |
| Hepatic Shear Rate (KPa)  | 1.35 ± 0.16    | 1.15 ± 0.12         | <0.001 | -0.2             | 1.32 ± 0.21          | 1.20 ± 0.17         | <0.001 | -0.12            | 0.306                           |

Data represent mean ± sd. Differences between end of treatment and baseline values were evaluated by mean of an ANOVA analysis.
